# Supplementary material
Source: publisher figshare collection journal article supplement (https://rs.figshare.com/ndownloader/files/17936906)
Supplement: Supplementary file 1 [file 17936906]

//Eli Amson; eli.amson1988@gmail.com
// The macro should be called when a rectangular selection is made. The center of the extracted substack will correspond to the center of this selection, on the active slice.
//Dependencies: TransformJ 
//v0.1

macro "MacroCCubeRect" {
	if (is("Virtual Stack")){

    exit("error: should not be a virtual stack");
    }
    
//Get x, y, z coordinates

getSelectionBounds(x, y, width, height);

hw=width/2;
hh=height/2;
X=round(x+hw);
Y=round(y+hh);
Z=getSliceNumber();

//Get cube edge length
lengthp=0;
Dialog.create("Choose edge length");
Dialog.addString("Edge length (length unit):", lengthp);
Dialog.show();
lengthp = parseFloat(Dialog.getString());
getPixelSize(unit, pw, ph, pd);
hlength=round((lengthp/pw)/2);

//Coordinates of cube centered around x,y,z and of the desired edge length
xS=X-hlength;
xL=X+hlength;
yS=Y-hlength;
yL=Y+hlength;
zS=Z-hlength;
zL=Z+hlength;

print("xS="+xS+"; xL="+xL+"; yS="+yS+"; yL="+yL+"; zS="+zS+"; zL="+zL); 
 
//Make cube out
run("TransformJ Crop","x-range="+xS+","+xL+" y-range="+yS+","+yL+" z-range="+zS+","+zL);
}
